# Supplementary material for: Association of Shenfu Injection with Reduced 28-Day Mortality in Critically Ill Patients with Sepsis: a Retrospective Propensity Score-matched Cohort Study
Source: Research Square preprint supplement (doi:10.21203/rs.3.rs-8156080/v1), 2025-12-08
Supplement: Supplementary file 1 [file dedbb59c16d9b756e5e1a82f.docx]

Supplmentary 2. Adverse Effect reported by studied population

| Adverse effect | Pre-PSM | | | Post-PSM | | |
| --- | --- | --- | --- | --- | --- | --- |
| SFI | Control | *P* value | SFI | Control | *P* value |
| Total of patients | 176 | 631 |  | 154 | 154 |  |
| allergy, No. (%) | 0 (0.00) | 3（0.48） | 1.000 | 0 (0.00) | 0 (0.00) | 1.000 |
| diarrhea, No. (%) | 1（0.57） | 2（0.32） | 0.522 | 0 (0.00) | 0 (0.00) | 1.000 |
| nausea, No. (%) | 1（0.57） | 3（0.48） | 1.000 | 0 (0.00) | 0 (0.00) | 1.000 |
| vomiting, No. (%) | 1（0.57） | 2（0.32） | 0.522 | 0 (0.00) | 0 (0.00) | 1.000 |
| gastralgia, No. (%) | 1（0.57） | 3（0.48） | 1.000 | 0 (0.00) | 1 (0.65) | 1.000 |
